# Supplementary material for: Analyzing the metabolic stress response of recombinant Escherichia coli cultures expressing human interferon-beta in high cell density fed batch cultures using time course transcriptomic data
Source: Royal Society of Chemistry journal article supplement (doi:10.1039/c1mb05414g), 2011-12-01
Supplement: c1mb05414g_2.pdf [file c1mb05414g_2.pdf]

## Spectrum Analysis Report

Date: 01/16/2008 Time: 15:05

FileName: \\Flex-pc\Ashish\16-01-08\beta-sbt\0\_A8\cali\1SRef\data\1\1r

Sequence Name: Chain A, Human Interferon-Beta Crystal Structure  
Formula:  
Parentmass: 1000.000  
Mass Error: 998.992  
MH+ (mono): 1.008  
MH+ (avg): 1.008  
Threshold (a.i.): 0.000  
Tolerance (Da): 1.000  
Number of Peaks: 43  
Above Threshold: 43  
Assigned Peaks: 0  
Not assigned Peaks: 43

[Abs. Int. \* 1000]

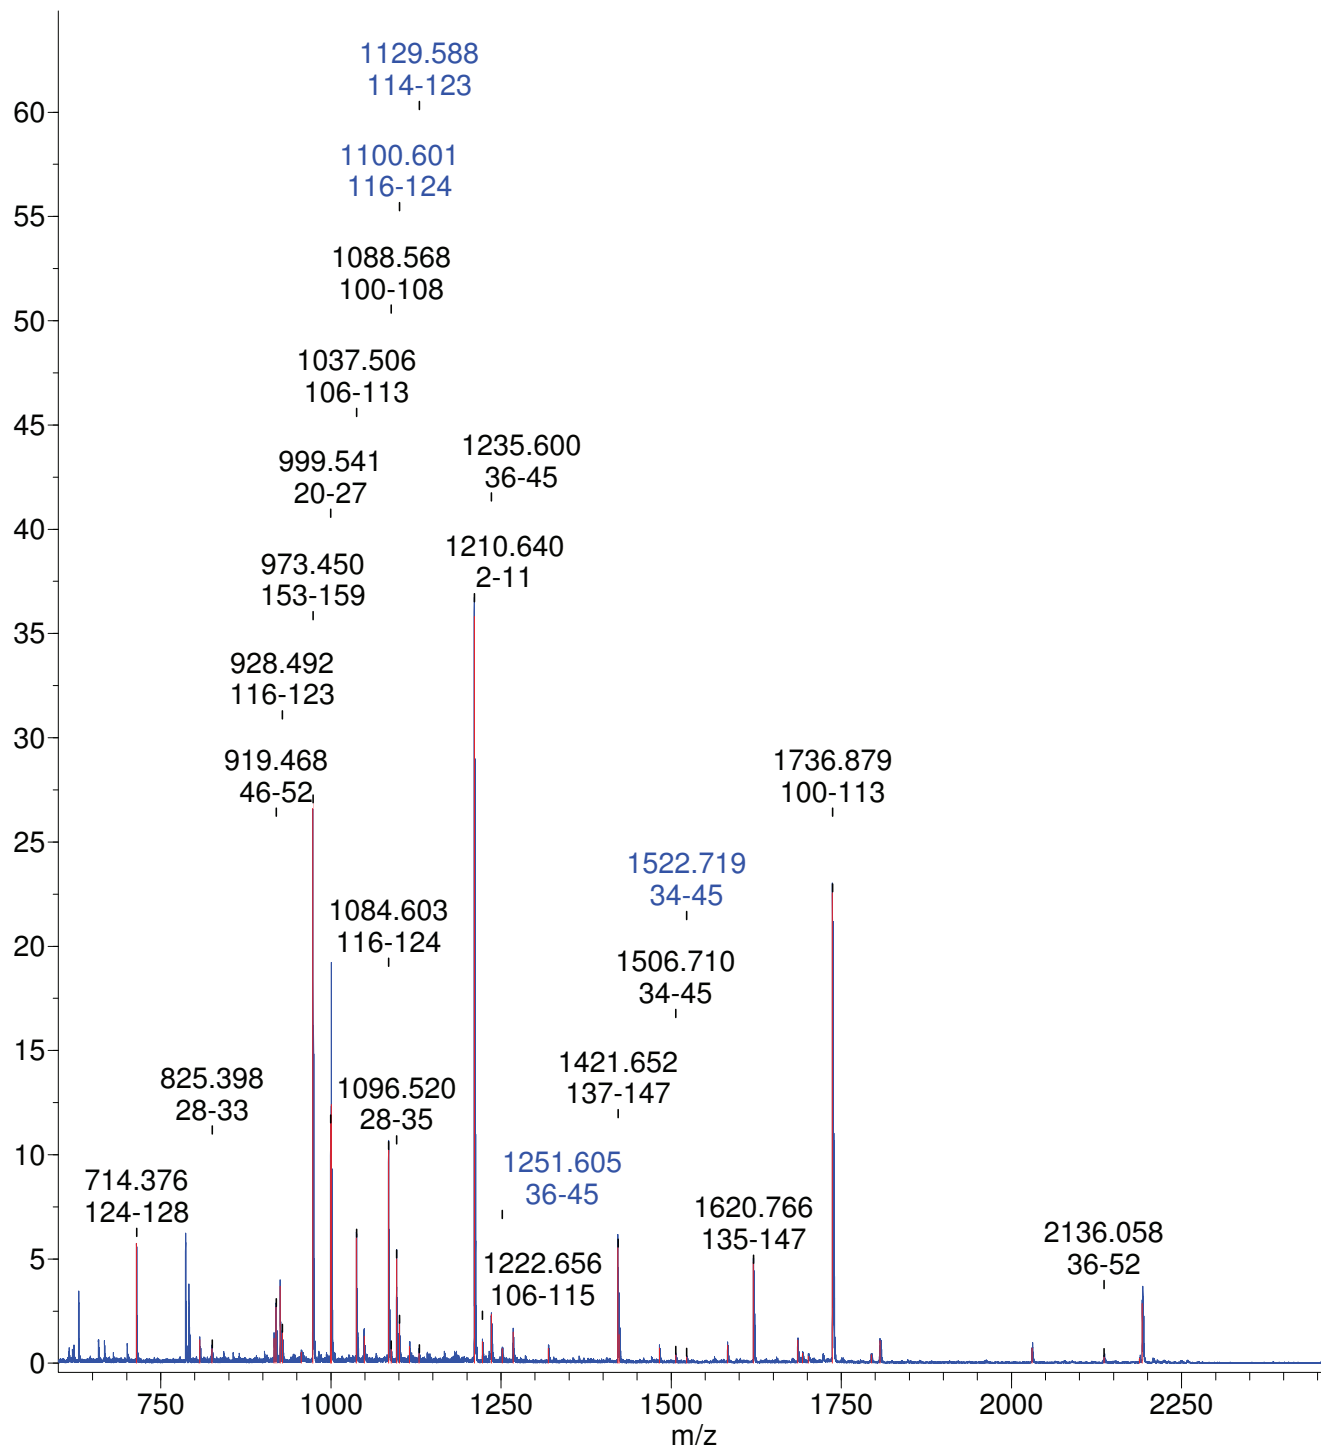

## Spectrum Analysis Report

Date: 01/16/2008 Time: 15:05

FileName: \\Flex-pc\Ashish\16-01-08\beta-sbt\0\_A8\cali\1SRef\data\11r

### Sequence data:

Chain A, Human Interferon-Beta Crystal Structure

Intensity Coverage: 81.2 % (139447 cnts) Sequence Coverage MS55.4%  
Sequence Coverage MS0.0% pI (isoelectric point): 9.6

|            |            |            |            |            |            |             |             |
|------------|------------|------------|------------|------------|------------|-------------|-------------|
| 10         | 20         | 30         | 40         | 50         | 60         | 70          | 80          |
| MSYNLLGFLQ | RSSNFQCQKL | LWQLNGRLEY | CLKDRMNFDI | PEEIKQLQQF | QKEDAALTIY | EMLQNI FAIF | RQDSSSTGWNE |
| 90         | 100        | 110        | 120        | 130        | 140        | 150         | 160         |
| ETIVENLLAN | VYHQINHLKT | VLEEKLEKED | FTRGKLMSSL | HLKRYYGRIL | HYLKAKEYSH | CAWTIVRVEI  | LRNFYFINRL  |
| 170        | TGYLRLN    |            |            |            |            |             |             |

### Display Parameter:

Sequence Name: Chain A, Human Interferon-Beta Crystal Structure  
Parentmass: 1000.000  
Mass Error: 998.992  
MH+ (mono): 1.008  
MH+ (avg): 1.008  
Threshold (a.i.): 0.000  
Tolerance (Da): 1.000  
Number of Peaks: 43  
Above Threshold: 43  
Assigned Peaks: 0  
Not assigned Peaks: 43

### Peaklist:

| Peak | Mass     | Intensity | Peak | Mass     | Intensity |
|------|----------|-----------|------|----------|-----------|
| 1    | 714.376  | 5447.000  | 2    | 807.394  | 1073.583  |
| 3    | 825.398  | 663.657   | 4    | 916.510  | 1133.172  |
| 5    | 919.468  | 2549.031  | 6    | 925.404  | 3504.931  |
| 7    | 928.492  | 1389.643  | 8    | 956.512  | 496.874   |
| 9    | 973.450  | 25461.686 | 10   | 999.541  | 10896.483 |
| 11   | 1000.541 | 11767.331 | 12   | 1037.506 | 5710.604  |
| 13   | 1048.867 | 1224.548  | 14   | 1084.603 | 9695.067  |
| 15   | 1088.568 | 630.618   | 16   | 1096.520 | 4756.274  |
| 17   | 1100.601 | 1787.048  | 18   | 1115.619 | 766.068   |
| 19   | 1129.588 | 444.165   | 20   | 1210.640 | 33965.113 |
| 21   | 1222.656 | 977.708   | 22   | 1235.600 | 2216.236  |
| 23   | 1251.605 | 664.967   | 24   | 1267.676 | 1415.972  |
| 25   | 1319.702 | 678.538   | 26   | 1421.652 | 5256.838  |
| 27   | 1423.681 | 1306.866  | 28   | 1482.766 | 685.638   |
| 29   | 1506.710 | 382.404   | 30   | 1522.719 | 290.684   |
| 31   | 1582.763 | 827.703   | 32   | 1620.766 | 4574.009  |
| 33   | 1685.797 | 1053.995  | 34   | 1692.852 | 456.899   |
| 35   | 1701.530 | 319.685   | 36   | 1736.879 | 21407.411 |
| 37   | 1793.907 | 381.327   | 38   | 1806.934 | 1019.174  |
| 39   | 2030.003 | 691.983   | 40   | 2136.058 | 280.655   |
| 41   | 2188.101 | 227.766   | 42   | 2192.050 | 2720.070  |
| 43   | 2996.495 | 478.741   |      |          |           |

### Matched Sequences:

#### Chain A, Human Interferon-Beta Crystal Structure

MSYNLLGFLQRSSNFQCQKLLWQLNGRLEYCLKDRMNFDIPEEIKQLQQFQKEDAALTIYEMLQNI FAIFRQDSSSTGWNE  
TIVENLLANVYHQINHLKTIVLEEKLEKEDFTRGKLMSSLHLKRYYGRILHYLKAKEYSHCAWTIVRVEILRNFYFINRLTG

## Spectrum Analysis Report

Date: 01/16/2008 Time: 15:05

FileName: \\Flex-pc\Ashish\16-01-08\beta-sbt\0\_A8\cali\1SRef\data\11r

YLRN

### Digest Matches

Tolerance = 100.000000 ppm, Trypsin/P

Score = 235.000000, Rank = 1, Database = NCBIInr, Accesskey = gi|3318960

Modifications: \ML C -H+CH2CONH2 Carbamidomethyl (C), \MO M O Oxidation (M),

| Mass Mr    | Dev.   | Range     | P | Sequence                       |
|------------|--------|-----------|---|--------------------------------|
| * 713.369  | 0.008  | 124 - 128 | 1 | RYYGR                          |
| * 824.390  | -0.020 | 28 - 33   | 0 | LEYCLK                         |
| * 918.461  | -0.032 | 46 - 52   | 0 | QLQQFQK                        |
| * 927.484  | -0.037 | 116 - 123 | 0 | LMSSLHLK                       |
| * 972.443  | -0.039 | 153 - 159 | 0 | NFYFINR                        |
| * 998.534  | -0.033 | 20 - 27   | 0 | LLWQLNGR                       |
| * 1036.498 | -0.021 | 106 - 113 | 1 | LEKEDFTR                       |
| * 1083.596 | -0.026 | 116 - 124 | 1 | LMSSLHLKR                      |
| * 1087.561 | -0.052 | 100 - 108 | 1 | TVLEEKLEK                      |
| * 1095.512 | -0.026 | 28 - 35   | 1 | LEYCLKDR                       |
| * 1099.593 | -0.024 | 116 - 124 | 1 | LMSSLHLKR 117: Oxidation (M)   |
| * 1128.581 | -0.052 | 114 - 123 | 1 | GKLMSSLHLK 117: Oxidation (M)  |
| * 1209.632 | -0.018 | 2 - 11    | 0 | SYNLLGFLQR                     |
| * 1221.649 | 0.014  | 106 - 115 | 2 | LEKEDFTRGK                     |
| * 1234.592 | 0.002  | 36 - 45   | 0 | MNFDIPEEIK                     |
| * 1250.598 | 0.013  | 36 - 45   | 0 | MNFDIPEEIK 36: Oxidation (M)   |
| * 1420.645 | -0.011 | 137 - 147 | 0 | EYSHCAWTIVR                    |
| * 1505.703 | -0.015 | 34 - 45   | 1 | DRMNFDIPEEIK                   |
| * 1521.711 | -0.002 | 34 - 45   | 1 | DRMNFDIPEEIK 36: Oxidation (M) |
| * 1619.759 | -0.029 | 135 - 147 | 1 | AKEYSHCAWTIVR                  |
| * 1735.871 | -0.028 | 100 - 113 | 2 | TVLEEKLEKEDFTR                 |
| * 2135.051 | -0.021 | 36 - 52   | 1 | MNFDIPEEIKQLQQFQK              |
